# Supplementary material for: Karyotype differentiation in 19 species of river loach fishes (Nemacheilidae, Teleostei): extensive variability associated with rDNA and heterochromatin distribution and its phylogenetic and ecological interpretation
Source: PubMed Central journal article supplement (PMC4647339; doi:10.1186/s12862-015-0532-9), 2015-11-14
Supplement: 12862_2015_532_MOESM3_ESM.pdf [file 12862_2015_532_MOESM3_ESM.pdf]

### **Cytochrome b**

| Primer Name          | Sequence 5'-3'                 | Direction | Reference |
|----------------------|--------------------------------|-----------|-----------|
| Glu L.Ca14337-14359: | GAA GAA CCA CCG TTG TTA TTC AA | F         | [16]      |
| Thr H.Ca15568-15548: | ACC TCC RAT CTY CGG ATT ACA    | R         | [16]      |

### **RAG 1**

| Primer Name | Sequence 5'-3'                  | Direction | Reference |
|-------------|---------------------------------|-----------|-----------|
| RAG-1F      | AGC TGT AGT CAG TAY CAC AAR ATG | F         | [17]      |
| RAG-Rv1     | TCC TGR AAG ATY TTG TAG AA      | R         | [18]      |

### **IRBP**

| Primer Name | Sequence 5'-3'                | Direction | Reference |
|-------------|-------------------------------|-----------|-----------|
| IRBP 101F   | TCM TGG ACA AYT ACT GCT CAC C | F         | [19]      |
| IRBP 109F   | AAC TAC TGC TCR CCA GAA AAR C | F         | [19]      |
| IRBP 1001R  | GGA AAT GCA TAG TTG TCT GCA A | R         | [19]      |
| IRBP 1162R  | TGG TGG WCT TYA GGC ACT TGT   | R         | [19]      |

### **5S rRNA**

| Primer Name | Sequence 5'-3'              | Direction | Reference |
|-------------|-----------------------------|-----------|-----------|
| 5SA         | TAC GCC CGA TCT CGT CCG ATC | F         | [20]      |
| 5SB         | CAG GCT GGT ATG GCC GTA AGC | R         | [20]      |

### **28S rRNA**

| Primer Name | Sequence 5'-3'              | Direction | Reference |
|-------------|-----------------------------|-----------|-----------|
| 28SA        | AAA CTC TGG TGG AGG TCC GT  | F         | [21]      |
| 28SB        | CTT ACC AAA AGT GGC CCA CTA | R         | [21]      |

- [16] Šlechtová V, Bohlen J, Freyhof J, Ráb P. Molecular phylogeny of the Southeast Asian freshwater fish family Botiidae (Teleostei: Cobitoidea) and the origin of polyploidy in their evolution. *Mol Phylogenet Evol.* 2006;39:529-41.
- [17] Quenouille B, Bermingham E, Planes S: Molecular systematics of the damselfishes (Teleostei : Pomacentridae): Bayesian phylogenetic analyses of mitochondrial and nuclear DNA sequences. *Mol Phylogenet Evol.* 2004;31:66-88.
- [18] Šlechtová V, Bohlen J, Tan HH: Families of Cobitoidea (Teleostei; Cypriniformes) as revealed from nuclear genetic data and the position of the mysterious genera *Barbucca*, *Psilorhynchus*, *Serpenticobitis* and *Vaillantella*. *Mol Phylogenet Evol.* 2007;44:1358-65.
- [19] Chen, W-J, Miya M, Saitoh K, Mayden RL: Phylogenetic utility of two existing and four novel nuclear gene loci in reconstructing Tree of Life of ray-finned fishes: The order Cypriniformes (Ostariophysi) as a case study. *Gene.* 2008;423:125-34.
- [20] Martins C, Galetti PM: Chromosomal localization of 5S rDNA genes in *Leporinus* fish (Anostomidae, Characiformes). *Chromosome Res.* 1999;7:363-7.
- [21] Naito E, Dewa K, Yamanouchi H, Kominami R: Ribosomal ribonucleic acid (rRNA) gene typing for species identification. *Journal of Forensic Science.* 1992;37:396–403.
