# Supplementary material for: Karyotype differentiation in 19 species of river loach fishes (Nemacheilidae, Teleostei): extensive variability associated with rDNA and heterochromatin distribution and its phylogenetic and ecological interpretation
Source: PubMed Central journal article supplement (PMC4647339; doi:10.1186/s12862-015-0532-9), 2015-11-14
Supplement: 12862_2015_532_MOESM6_ESM.pdf [file 12862_2015_532_MOESM6_ESM.pdf]

## A

*Schistura pridii* A7548 short GTTCGGGCTG GTTAGTACTT GGATGGGAGA CCGCCTGGGA ATACCAGGTG CTGTAAGCCT TTATCATTTT  
*Schistura pridii* A7549 .....Y.... ..R.....

*Schistura pridii* A7548 short TGGCTTTCCT TGATTTTCGTT TTCAACTGAA TTTTAAAG AGCCTGCAGG TCACCGCCTC TTTCGCTTAC  
*Schistura pridii* A7549 .....

*Schistura pridii* A7548 short GGCCATACCA GCCTGA  
*Schistura pridii* A7549 .....

---

## B

*Schistura pridii* A7548 GYTTCGGGCTG GTYAGTRCTT GGATGGGAGA CCRCTGGGA ATACYRGGTG CTGTAAGCCT TTATCATTTY

*Schistura pridii* A7548 TGGCWTTTCCT TGATTTTCGTT TTCAAYTKAT GCCMTTCGCC TACAGGCTCA GTKTTMATTT WTTTCATCTCC

*Schistura pridii* A7548 ATGCCTAGAC AGCCCAGTGA CTGTTGCTGA RCGAWGTGAG GCTTTTCAAA AATCAACGAA ATSAAAGGAT

*Schistura pridii* A7548 GAAAGGCATC ATTCCGACTW WGGAWAAACK ARTSGGATAC GCAAAGAAAYR AAAAACATKW AAAATAATCT

*Schistura pridii* A7548 AAAACKCAGT TRTGCTCGCC GCGGTCATTC TSRASCAGGC AAGTAAACGG GACATCTGAC GARTGAGAAC

*Schistura pridii* A7548 CMTCAWGGGA GTCCCAGGTR AAAGTAAMAT KTTTCTTCTT AATATTAAGC CTGCTCTTGG GACATTCCAA

*Schistura pridii* A7548 AMAGAAACCC AAGCAGTGGC WTGAAGGGGA AGAGTCGCRT GGTAGCCGTC CAGCTCTTGG CTAGCTAGGA

*Schistura pridii* A7548 WT TTTTAAAR AKCCTGCAGG TCACMGCTC TTTCGCTTAC GGCCATACCA GCCTGA
